# Supplementary material for: Association of Hypernatremia with Immune Profiles and Clinical Outcomes in Adult Intensive Care Unit Patients with Sepsis
Source: MDPI journal article supplement (doi:10.3390/biomedicines10092285), 2022-09-14

# Association of Hypernatremia with Immune Profiles and Clinical Outcomes in Adult Intensive Care Unit Patients with Sepsis

## Supplementary Materials

**Table S1.** Baseline plasma cytokine levels in patients with and without dysnatremia on admission.

| Cytokine              | Hyponatremia<br>(n=65) | Eunatremia<br>(n= 80) | Hypernatremia<br>(n=15) | p-value |
|-----------------------|------------------------|-----------------------|-------------------------|---------|
| IL-6 (pg/uL)          | 64.5 (87.6)            | 48.3 (145.2)          | 82.6 (334.1)            | 0.751   |
| IL-10 (pg/ul)         | 15.6 (65.4)            | 23.6 (60.5)           | 46.7 (203.3)            | 0.410   |
| G-CSF (pg/ul)         | 77.0 (188.7)           | 64.1 (119.3)          | 73.9 (416.7)            | 0.805   |
| TNF- $\alpha$ (pg/ul) | 43.3 (48.8)            | 29.1 (48.9)           | 40.7 (53.5)             | 0.241   |

Abbreviations: G-CSF, granulocyte colony-stimulating factor; IL, interleukin; TNF, tumor necrosis factor; IQR, interquartile range.

All data are presented as medians (IQRs).

**Table S2.** First 3 days of fluid accumulation between patients in each group

|              | Hyponatremia         | Eunatremia             | Hypernatremia  | p-value |
|--------------|----------------------|------------------------|----------------|---------|
| <b>Day 1</b> |                      |                        |                |         |
| Input        | 1703.7(1400.6)       | 1735.8(1302.6)         | 2034.2(1230.7) | 0.066   |
| Input-Ouput  | 597.5(1381.2)        | 473.9(1351.4)          | 810.0(1454.6)  | 0.560   |
| <b>Day 2</b> |                      |                        |                |         |
| Input        | 2470.2(1412.1)       | 2408.0(1402.9)         | 2464.9(1415.8) | 0.879   |
| Input-Ouput  | 899.9(1451.7)        | 674.3(1458.9)          | 1081.6(1587.9) | 0.098   |
| <b>Day 3</b> |                      |                        |                |         |
| Input        | 2260.5(1310.3)       | 2191.6(1389.8)         | 2299.7(1395.4) | 0.451   |
| Input-Ouput  | 484.2(1392.7)        | 465.6(1220.3)          | 760.5(1181.9)  | 0.097   |
|              | Sustained eunatremia | Acquired hypernatremia | p-value        |         |
| <b>Day 1</b> |                      |                        |                |         |
| Input        | 1717.1(1287.3)       | 1933.4(1631.2)         |                | 0.482   |
| Input-Ouput  | 431.7(1353.5)        | 449.7(1539.6)          |                | 0.506   |
| <b>Day 2</b> |                      |                        |                |         |
| Input        | 2494.5(1441.3)       | 2619.7(1408.4)         |                | 0.266   |
| Input-Ouput  | 616.0(1460.9)        | 755.6(1679.1)          |                | 0.456   |
| <b>Day 3</b> |                      |                        |                |         |
| Input        | 2322.5(1441.1)       | 2459.9(1202.7)         |                | 0.177   |
| Input-Ouput  | 512.4(1177.9)        | 462.7(1539.7)          |                | 0.778   |

All data are presented as mean (standard deviation); the unit of data is milliliters.

**Figure S1.** Kaplan–Meier survival curve of patients with sustained eunatremia, sustained hypernatremia, progression from eunatremia to hypernatremia, or regression from hypernatremia to eunatremia.

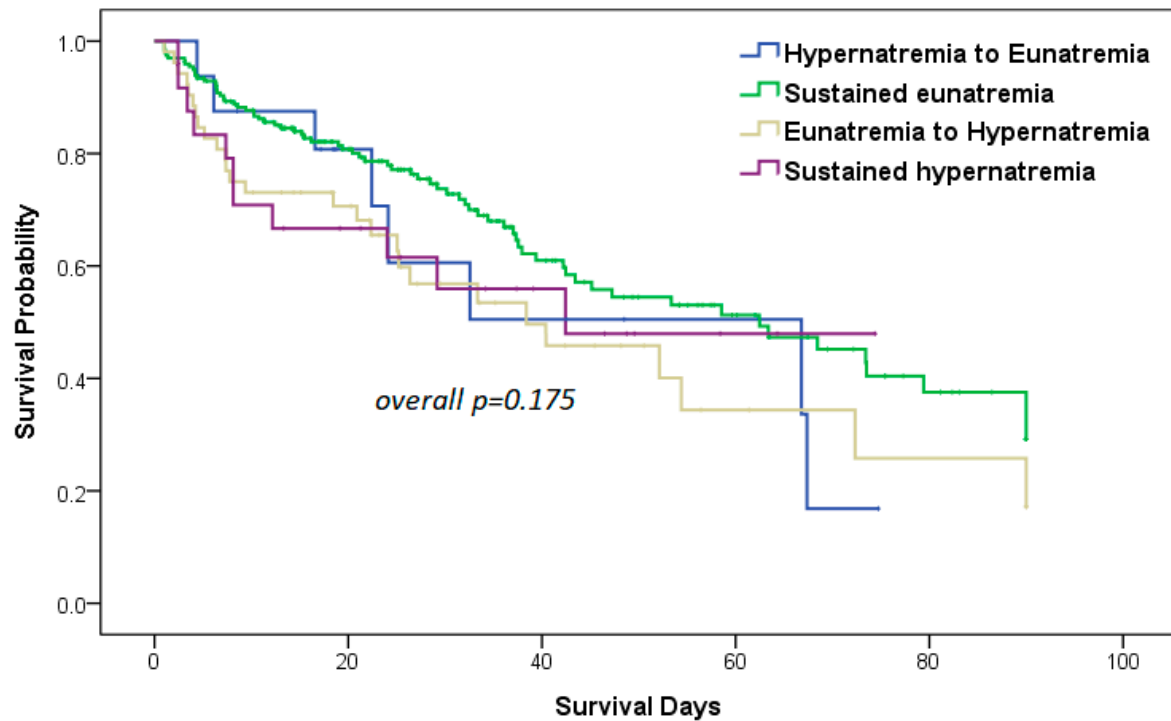

Supplement: s1 [file s1]
